# Supplementary material
Source: PubMed Central journal article supplement (PMC5522994)
Supplement: BPH-174-2784-s001.pdf [file BPH-174-2784-s001.pdf]

Supplemental Figure S1

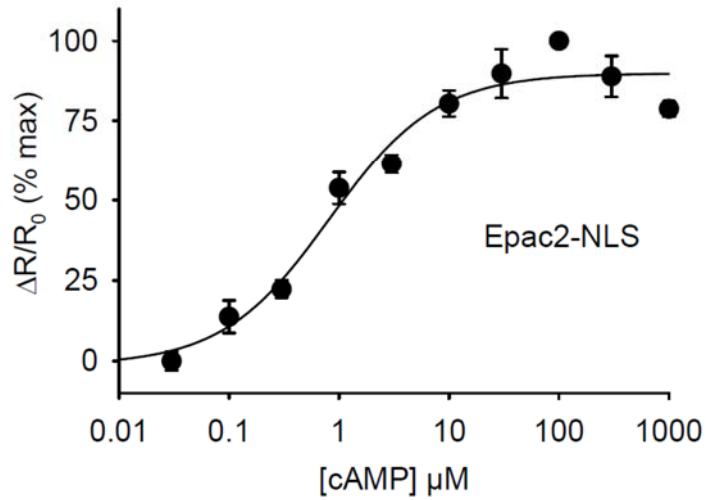

**Supplemental Figure S1. *In vitro* calibration of Epac2-NLS biosensor.**

Concentration-response curve for cAMP activation of Epac2-NLS (n = 5).  $EC_{50}$  and Hill slope were  $1.04 \pm 0.13 \mu\text{M}$  and  $0.84 \pm 0.087$ , respectively. Experiments were conducted as described previously (Agarwal et al., 2014).

## Supplemental Figure S2

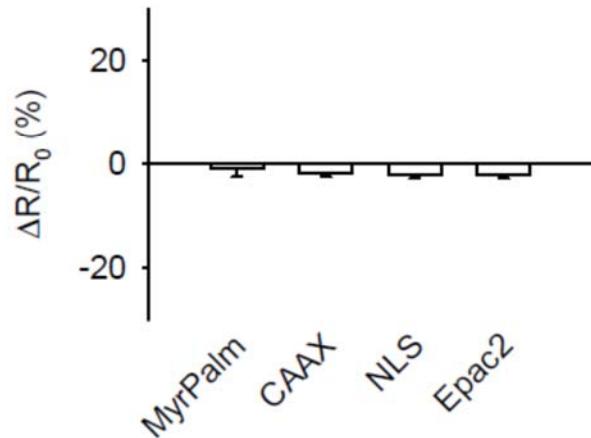

**Supplemental Figure S2. Exposure to the adenylyl cyclase inhibitor MDL-12,330A (MDL).** FRET response ( $\Delta R/R_0$ ) observed following 10 min exposure to 100  $\mu$ M MDL. Because MDL alone had no effect, subsequent exposure to IBMX plus forskolin was used at the end of each experiment as a positive control. There was no statistical difference ( $p > 0.7$ , One Way ANOVA) in the FRET responses detected by MyrPalm ( $-1.0 \pm 1.6\%$ ,  $n = 5$ ), CAAX ( $-1.9 \pm 0.73\%$ ,  $n = 5$ ), NLS ( $-2.2 \pm 0.62\%$ ,  $n = 7$ ), and Epac2 ( $-2.2 \pm 0.78\%$ ,  $n = 6$ ).

Supplemental Table 1

| <b>cAMP affinity of FRET-based biosensors</b> |                             |                         |                     |
|-----------------------------------------------|-----------------------------|-------------------------|---------------------|
|                                               | <b>EC<sub>50</sub> (μM)</b> | <b>Hill coefficient</b> | <b>ref</b>          |
| <b>Epac2-camps</b>                            | 0.31                        | 0.84                    | Agarwal et al. 2014 |
| <b>Epac2-MyrPalm</b>                          | 0.43                        | 0.82                    |                     |
| <b>Epac2-CAAX</b>                             | 0.16                        | 1.1                     |                     |
| <b>Epac2-NLS</b>                              | 1.04                        | 0.84                    | figure S1           |
